# Supplementary material for: Measuring brand association strength with EEG: A single-trial N400 ERP study
Source: PubMed Central journal article supplement (PMC6557491; doi:10.1371/journal.pone.0217125), 2019-06-10
Supplement: pone.0217125.s005.pdf [file pone.0217125.s005.pdf]

| Participants | Trials removed | "no answer" /"HD" | Netflix-Price | Netflix-Relaxation | Netflix -Television | Netflix -Unrelated | Rex&Rio-Price | Rex&Rio -Relaxation | Rex&Rio -Television | Rex&Rio -Unrelated |
|--------------|----------------|-------------------|---------------|--------------------|---------------------|--------------------|---------------|---------------------|---------------------|--------------------|
| 1            | 17             | 4/13              | 7             | 8                  | 9                   | 9                  | 5             | 10                  | 8                   | 7                  |
| 2            | 5              | 2/3               | 9             | 8                  | 9                   | 9                  | 10            | 10                  | 10                  | 10                 |
| 3            | 27             | 1/26              | 6             | 5                  | 7                   | 9                  | 6             | 6                   | 6                   | 8                  |
| 4            | 8              | 2/6               | 9             | 8                  | 9                   | 10                 | 8             | 10                  | 10                  | 8                  |
| 5            | 19             | 6/14              | 8             | 6                  | 9                   | 7                  | 6             | 7                   | 9                   | 9                  |
| 6            | 6              | 3/3               | 10            | 9                  | 7                   | 9                  | 10            | 9                   | 10                  | 10                 |
| 7            | 13             | 1/12              | 9             | 9                  | 9                   | 7                  | 8             | 8                   | 9                   | 8                  |
| 8            | 12             | 2/11              | 8             | 8                  | 7                   | 9                  | 8             | 8                   | 10                  | 10                 |
| 9            | 4              | 2/2               | 8             | 10                 | 10                  | 9                  | 10            | 10                  | 9                   | 10                 |
| 10           | 15             | 3/13              | 7             | 9                  | 7                   | 9                  | 9             | 10                  | 8                   | 6                  |
| 11           | 4              | 3/1               | 9             | 10                 | 9                   | 10                 | 10            | 9                   | 10                  | 9                  |
| 12*          | 38             | 9/30              | 5             | 5                  | 9                   | 8                  | 1             | 4                   | 6                   | 4                  |
| 13           | 7              | 2/5               | 8             | 8                  | 10                  | 8                  | 9             | 10                  | 10                  | 10                 |
| 14           | 2              | 2/0               | 10            | 9                  | 10                  | 10                 | 9             | 10                  | 10                  | 10                 |
| 15           | 5              | 1/4               | 10            | 10                 | 9                   | 9                  | 10            | 8                   | 10                  | 9                  |
| 16           | 9              | 2/7               | 9             | 9                  | 8                   | 10                 | 8             | 9                   | 8                   | 10                 |
| 17           | 3              | 3/0               | 9             | 10                 | 10                  | 10                 | 9             | 10                  | 9                   | 10                 |
| 18           | 8              | 2/6               | 8             | 10                 | 9                   | 8                  | 10            | 10                  | 9                   | 8                  |
| 19           | 1              | 1/0               | 10            | 10                 | 10                  | 9                  | 10            | 10                  | 10                  | 10                 |
| 20           | 4              | 3/1               | 8             | 10                 | 10                  | 10                 | 10            | 9                   | 9                   | 10                 |
| 21           | 3              | 0/3               | 9             | 10                 | 10                  | 10                 | 9             | 10                  | 9                   | 10                 |
| 22           | 5              | 4/1               | 9             | 10                 | 9                   | 8                  | 10            | 10                  | 10                  | 9                  |
| 23           | 19             | 2/17              | 7             | 6                  | 10                  | 8                  | 6             | 9                   | 8                   | 7                  |
| 24           | 18             | 14/5              | 8             | 6                  | 8                   | 7                  | 8             | 9                   | 6                   | 10                 |
| 25           | 2              | 0/2               | 10            | 10                 | 10                  | 9                  | 10            | 10                  | 9                   | 10                 |
| 26*          | 59             | 55/14             | 4             | 2                  | 3                   | 0                  | 5             | 1                   | 3                   | 3                  |
| <b>Tot</b>   | <b>313</b>     | <b>129/199</b>    | <b>214</b>    | <b>215</b>         | <b>227</b>          | <b>221</b>         | <b>214</b>    | <b>226</b>          | <b>225</b>          | <b>225</b>         |
